# Supplementary material for: Sensitivity to Cisplatin in Head and Neck Cancer Cells Is Significantly Affected by Patient-Derived Cancer-Associated Fibroblasts
Source: PubMed Central journal article supplement (PMC7918851; doi:10.3390/ijms22041912), 2021-02-15
Supplement: ijms-22-01912-s001.pdf [file ijms-22-01912-s001.pdf]

**Supplementary File 1.** Sensitivity to cisplatin in head and neck cancer cells is significantly affected by patient-derived cancer-associated fibroblasts.

**Supplementary figure 1:** Flow cytometric analysis of CD90 status in cancer-associated fibroblast cultures.

**Supplementary table 1:** Colony area of FaDu cells non-cocultured (ctrl), co-cultured and treated with cisplatin and respective sensitizing ratio.

**Supplementary table 2:** Gene expression fold changes of cells affected to co-culture media relative to the depleted medium.

**Supplementary table 3:** Correlation matrix of log<sub>2</sub> gene expression with sensitising ratio (colony-forming assay).

**Supplementary table 4:** log<sub>2</sub> fold change values of FaDu and Detroit 562 cells exposed to co-culture and/or cisplatin treatment.

**Supplementary figure 1: Flow cytometric analysis of CD90 status in cancer-associated fibroblast cultures.** Forward scatter/side scatter (left) and FL2-CD90 histogram (right) with gating based on isotype control and non-stained control of each sample. For all samples, CD90-staining (first line), isotype control (middle line) and negative staining was tested.

### CAF culture 1 CD90

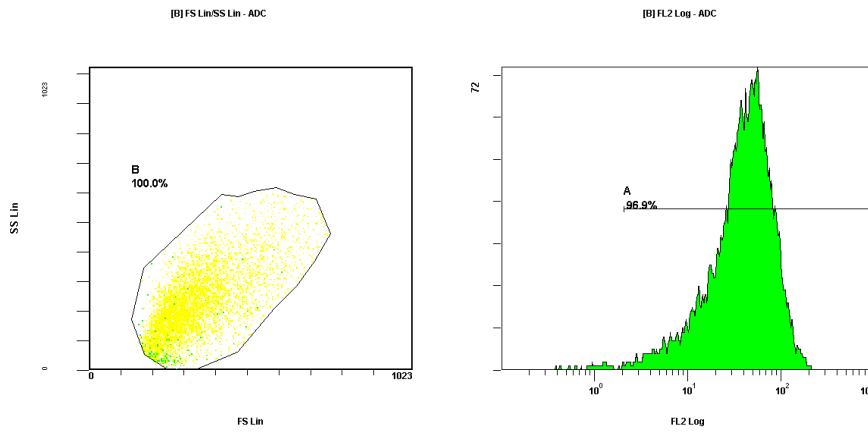

### CAF culture 1 isotype control

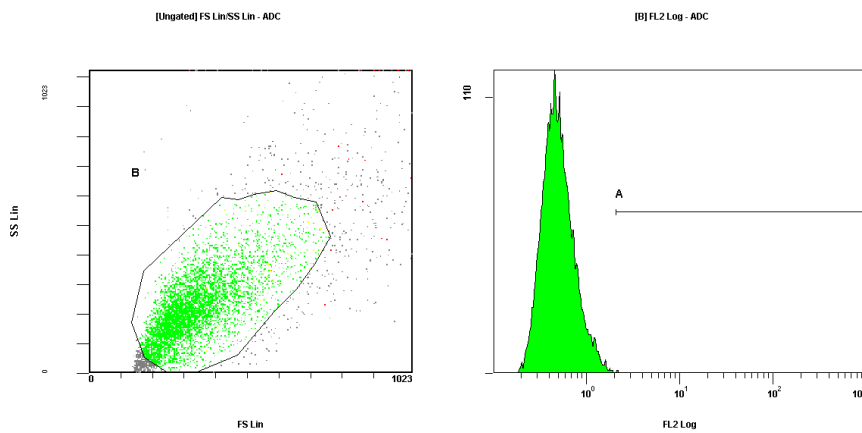

### CAF culture 1 no staining

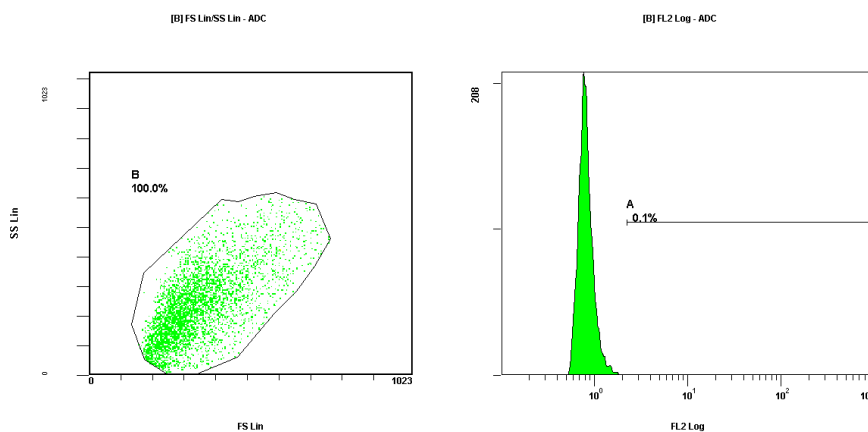

## CAF culture 2 CD90

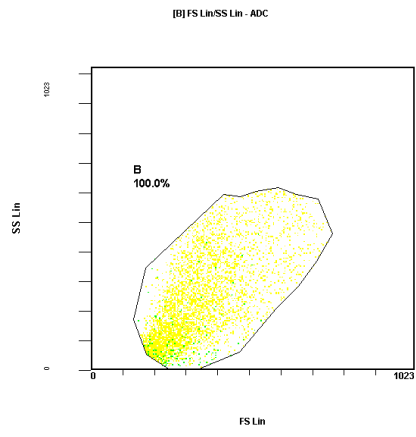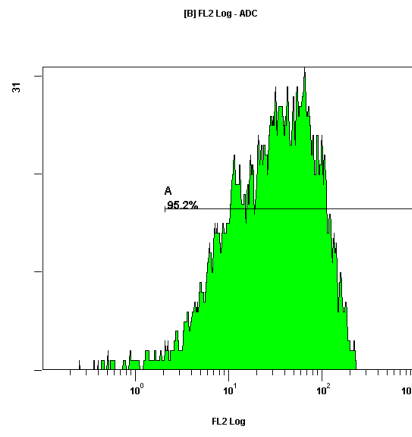

## CAF culture 2 isotype control

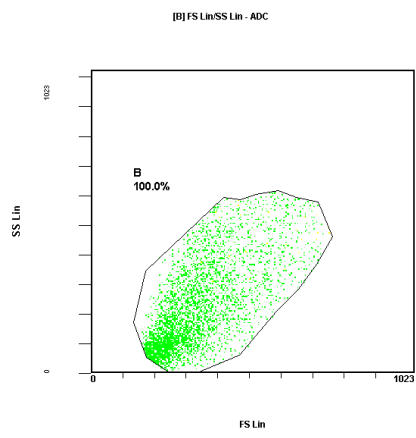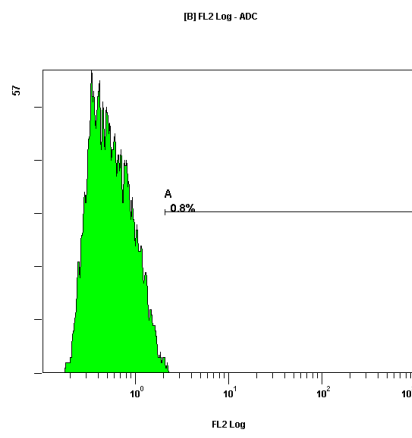

## CAF culture 2 no staining

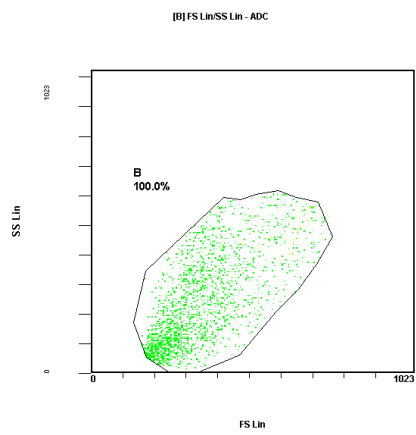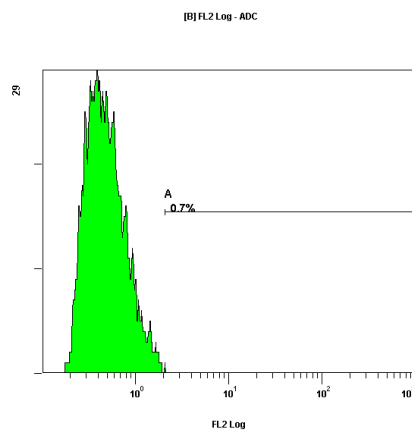

## CAF culture 3 CD90 status

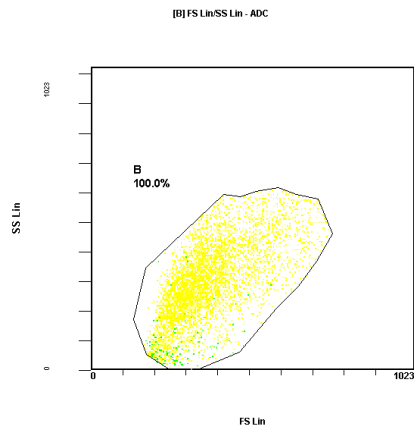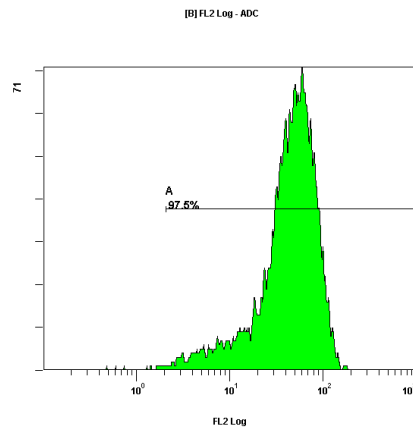

## CAF culture 3 isotype control

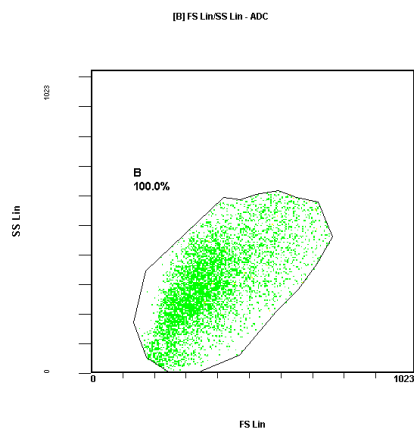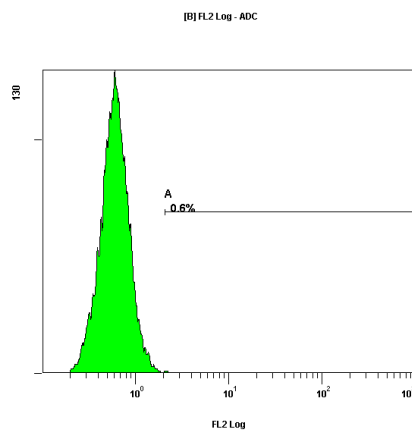

## CAF culture 3 no staining

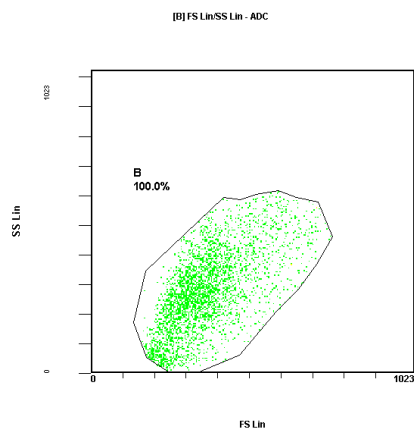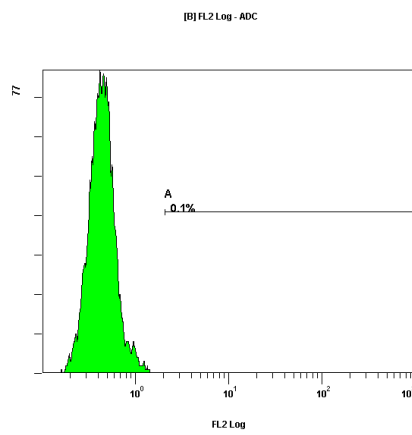

**Supplementary table 1: Colony area of FaDu cells non-cocultured (ctrl), co-cultured and treated with cisplatin and respective sensitizing ratio.** CAF, cancer-associated fibroblasts, IQR, interquartile range. Calculation of Sensitizing ratio explained in Methods.

| patient-derived CAF | FaDu                                        | FaDu + 5uM cisplatin                        | sensitizing ratio, median, IQR |
|---------------------|---------------------------------------------|---------------------------------------------|--------------------------------|
|                     | well area covered by cells, median, IQR (%) | well area covered by cells, median, IQR (%) |                                |
| ctrl                | 11.03 (10.8 to 12.98)                       | 5.06 (4.29 to 6.75)                         | 0.16 (-0.2 to 0.43)            |
| 5.1.                | 4.81 (3.72 to 6.87)                         | 1.2 (0.92 to 1.48)                          | 1.08 (0.81 to 1.54)            |
| 6.1.                | 21.72 (20.58 to 23.48)                      | 6.44 (5.97 to 6.66)                         | 0.68 (0.63 to 0.79)            |
| 7.1.                | 24.55 (20.57 to 25.87)                      | 13.44 (11.08 to 13.47)                      | -0.34 (-0.35 to -0.03)         |
| 9.1.                | 11.66 (10.43 to 11.7)                       | 4.68 (3.55 to 6.13)                         | 0.11 (-0.23 to 0.59)           |
| 11.1.               | 21.56 (20.51 to 24.6)                       | 15.65 (10.4 to 16.01)                       | -0.55 (-0.59 to 0.25)          |
| 12.1.               | 14.44 (13.97 to 15.31)                      | 7.92 (7.54 to 8.93)                         | -0.21 (-0.37 to -0.14)         |
| 14.1.               | 10.49 (9.7 to 11.81)                        | 4.8 (3.95 to 5.84)                          | 0.07 (-0.19 to 0.39)           |

**Supplementary table 2: Gene expression fold changes of cells affected to co-culture media relative to the depleted medium. IQR, interquartile range.**

| Detroit 562 |                          |              | Fadu  |                          |              |
|-------------|--------------------------|--------------|-------|--------------------------|--------------|
| gene        | median fold change (IQR) | p-value      | gene  | median fold change (IQR) | p-value      |
| VEGFA       | 1 (0.9 to 1.11)          | 0.904        | VEGFA | 2.81 (2.32 to 5.44)      | <b>0.008</b> |
| MKI67       | 0.59 (0.41 to 0.9)       | <b>0.021</b> | MKI67 | 1.31 (1.06 to 1.73)      | 0.103        |
| EGFR        | 0.67 (0.6 to 0.71)       | <b>0.001</b> | EGFR  | 0.76 (0.62 to 0.89)      | <b>0.032</b> |
| SNAIL       | 1.31 (1.08 to 1.9)       | <b>0.043</b> | SNAIL | 0.63 (0.54 to 0.7)       | <b>0.001</b> |
| FOLR1       | 0.24 (0.2 to 0.4)        | <b>0.002</b> | FOLR1 | 0.71 (0.56 to 0.74)      | 0.086        |
| IL-6        | 1.21 (1 to 1.61)         | 0.089        | IL-6  | 0.32 (0.28 to 0.39)      | <b>0.000</b> |
| BCL-2       | 0.55 (0.54 to 0.63)      | <b>0.000</b> | BCL-2 | 0.98 (0.9 to 1.03)       | 0.599        |
| BIRC5       | 0.78 (0.7 to 1.06)       | 0.549        | BIRC5 | 0.72 (0.58 to 0.83)      | <b>0.011</b> |
| CCL2        | 0.36 (0.25 to 0.46)      | <b>0.028</b> | CCL2  | 1.04 (0.73 to 1.29)      | 0.691        |
| CAV1        | 1.22 (1.16 to 1.47)      | <b>0.007</b> | CAV1  | 0.82 (0.74 to 0.96)      | 0.083        |
| EGF         | 0.26 (0.22 to 0.45)      | <b>0.001</b> | EGF   | 1.58 (1.47 to 1.64)      | <b>0.000</b> |
| NFKB        | 0.65 (0.64 to 0.83)      | <b>0.010</b> | NFKB  | 1.09 (0.97 to 1.41)      | 0.317        |
| NANOG       | 0.26 (0.2 to 0.45)       | <b>0.005</b> | NANOG | 1.21 (1.06 to 1.41)      | <b>0.043</b> |
| SOX2        | 2.86 (1.65 to 2.98)      | <b>0.021</b> | SOX2  | 0.85 (0.84 to 1.05)      | 0.264        |
| POU5F       | 0.51 (0.43 to 0.63)      | <b>0.003</b> | POU5F | 0.72 (0.57 to 0.79)      | <b>0.042</b> |
| PGE2S       | 1.16 (1.04 to 1.2)       | <b>0.026</b> | PGE2S | 0.82 (0.71 to 0.88)      | 0.061        |
| COX2        | 0.36 (0.33 to 0.62)      | <b>0.007</b> | COX2  | 1.46 (1.27 to 2.14)      | 0.061        |
|             |                          |              | EP3   | 0.85 (0.83 to 1.04)      | 0.289        |

**Supplementary table 3: Correlation matrix of log2 gene expression with sensitising ratio (colony-forming assay). Asterisk indicate correlation p-value < 0.05.**

| FaDu cells + cisplatin, Correlation coefficient |        |        |       |       |       |       |       |        |        |       |       |       |        |       |       |        |       |       |              |
|-------------------------------------------------|--------|--------|-------|-------|-------|-------|-------|--------|--------|-------|-------|-------|--------|-------|-------|--------|-------|-------|--------------|
|                                                 | VEGFA  | MKI67  | EGFR  | SNAIL | FOLR1 | IL-6  | BCL-2 | BIRC5  | CCL2   | CAV1  | EGF   | NFKB  | NANOG  | SOX2  | POU5F | PGE2S  | COX2  | EP3   | colony ratio |
| VEGFA                                           | 1*     | -0.71* | 0.61  | -0.32 | 0.89* | -0.16 | 0.42  | -0.7   | -0.65  | 0     | -0.59 | 0.72* | 0.66   | 0.35  | -0.14 | 0.9*   | 0.82* | 0.57  | 0.59         |
| MKI67                                           | -0.71* | 1*     | -0.14 | 0.8*  | -0.61 | 0.65  | -0.17 | 0.82*  | 0.77*  | 0.63  | 0.49  | -0.14 | -0.42  | -0.16 | 0.34  | -0.66  | -0.32 | -0.18 | -0.3         |
| EGFR                                            | 0.61   | -0.14  | 1*    | 0.28  | 0.77* | 0.52  | 0.14  | -0.43  | -0.46  | 0.61  | -0.3  | 0.7   | 0.58   | 0.25  | 0.36  | 0.77*  | 0.85* | 0.4   | 0.81*        |
| SNAIL                                           | -0.32  | 0.8*   | 0.28  | 1*    | -0.24 | 0.85* | 0.08  | 0.54   | 0.4    | 0.88* | 0.4   | 0.14  | 0.01   | 0.13  | 0.57  | -0.18  | 0.18  | 0.11  | -0.14        |
| FOLR1                                           | 0.89*  | -0.61  | 0.77* | -0.24 | 1*    | 0.01  | 0.05  | -0.57  | -0.6   | 0.09  | -0.42 | 0.79* | 0.44   | 0.07  | -0.22 | 0.92*  | 0.77* | 0.51  | 0.72*        |
| IL-6                                            | -0.16  | 0.65   | 0.52  | 0.85* | 0.01  | 1*    | -0.16 | 0.32   | 0.09   | 0.93* | 0.45  | 0.21  | 0      | -0.1  | 0.47  | 0.02   | 0.38  | 0.02  | 0.18         |
| BCL-2                                           | 0.42   | -0.17  | 0.14  | 0.08  | 0.05  | -0.16 | 1*    | -0.4   | -0.16  | 0.13  | -0.64 | 0.21  | 0.8*   | 0.86* | 0.5   | 0.25   | 0.44  | 0.32  | 0.08         |
| BIRC5                                           | -0.7   | 0.82*  | -0.43 | 0.54  | -0.57 | 0.32  | -0.4  | 1*     | 0.89*  | 0.26  | 0.59  | -0.11 | -0.75* | -0.43 | -0.17 | -0.69  | -0.57 | -0.14 | -0.56        |
| CCL2                                            | -0.65  | 0.77*  | -0.46 | 0.4   | -0.6  | 0.09  | -0.16 | 0.89*  | 1*     | 0.16  | 0.31  | -0.1  | -0.56  | -0.13 | -0.05 | -0.76* | -0.62 | 0.01  | -0.4         |
| CAV1                                            | 0      | 0.63   | 0.61  | 0.88* | 0.09  | 0.93* | 0.13  | 0.26   | 0.16   | 1*    | 0.2   | 0.41  | 0.22   | 0.18  | 0.57  | 0.1    | 0.52  | 0.24  | 0.29         |
| EGF                                             | -0.59  | 0.49   | -0.3  | 0.4   | -0.42 | 0.45  | -0.64 | 0.59   | 0.31   | 0.2   | 1*    | -0.45 | -0.6   | -0.43 | -0.05 | -0.51  | -0.38 | -0.07 | -0.41        |
| NFKB                                            | 0.72*  | -0.14  | 0.7   | 0.14  | 0.79* | 0.21  | 0.21  | -0.11  | -0.1   | 0.41  | -0.45 | 1*    | 0.32   | 0.1   | -0.16 | 0.69   | 0.7   | 0.54  | 0.55         |
| NANOG                                           | 0.66   | -0.42  | 0.58  | 0.01  | 0.44  | 0     | 0.8*  | -0.75* | -0.56  | 0.22  | -0.6  | 0.32  | 1*     | 0.86* | 0.61  | 0.61   | 0.74* | 0.47  | 0.53         |
| SOX2                                            | 0.35   | -0.16  | 0.25  | 0.13  | 0.07  | -0.1  | 0.86* | -0.43  | -0.13  | 0.18  | -0.43 | 0.1   | 0.86*  | 1*    | 0.69  | 0.19   | 0.4   | 0.57  | 0.27         |
| POU5F                                           | -0.14  | 0.34   | 0.36  | 0.57  | -0.22 | 0.47  | 0.5   | -0.17  | -0.05  | 0.57  | -0.05 | -0.16 | 0.61   | 0.69  | 1*    | -0.04  | 0.28  | 0.1   | 0.2          |
| PGE2S                                           | 0.9*   | -0.66  | 0.77* | -0.18 | 0.92* | 0.02  | 0.25  | -0.69  | -0.76* | 0.1   | -0.51 | 0.69  | 0.61   | 0.19  | -0.04 | 1*     | 0.85* | 0.35  | 0.58         |
| COX2                                            | 0.82*  | -0.32  | 0.85* | 0.18  | 0.77* | 0.38  | 0.44  | -0.57  | -0.62  | 0.52  | -0.38 | 0.7   | 0.74*  | 0.4   | 0.28  | 0.85*  | 1*    | 0.47  | 0.63         |
| EP3                                             | 0.57   | -0.18  | 0.4   | 0.11  | 0.51  | 0.02  | 0.32  | -0.14  | 0.01   | 0.24  | -0.07 | 0.54  | 0.47   | 0.57  | 0.1   | 0.35   | 0.47  | 1*    | 0.44         |
| colony ratio                                    | 0.59   | -0.3   | 0.81* | -0.14 | 0.72* | 0.18  | 0.08  | -0.56  | -0.4   | 0.29  | -0.41 | 0.55  | 0.53   | 0.27  | 0.2   | 0.58   | 0.63  | 0.44  | 1*           |

  

| FaDu cells untreated, Correlation coefficient |       |       |       |       |       |       |       |       |       |       |       |       |       |       |       |       |       |       |              |
|-----------------------------------------------|-------|-------|-------|-------|-------|-------|-------|-------|-------|-------|-------|-------|-------|-------|-------|-------|-------|-------|--------------|
|                                               | VEGFA | MKI67 | EGFR  | SNAIL | FOLR1 | IL-6  | BCL-2 | BIRC5 | CCL2  | CAV1  | EGF   | NFKB  | NANOG | SOX2  | POU5F | PGE2S | COX2  | EP3   | colony ratio |
| VEGFA                                         | 1*    | 0.3   | 0.48  | 0.16  | 0.5   | -0.15 | 0.68* | 0.26  | -0.58 | 0.43  | 0.32  | 0.84* | 0.58  | -0.22 | 0.07  | 0.59  | 0.9*  | 0.63  | 0.36         |
| MKI67                                         | 0.3   | 1*    | 0.34  | 0.23  | 0.23  | -0.05 | 0.52  | 0.11  | -0.01 | 0.4   | 0.51  | 0.39  | 0.18  | 0.21  | -0.33 | 0.18  | 0.14  | 0.13  | 0.21         |
| EGFR                                          | 0.48  | 0.34  | 1*    | 0.76* | 0.91* | 0.72* | 0.64  | 0.74* | -0.4  | 0.95* | 0.47  | 0.85* | -0.11 | -0.16 | 0.22  | 0.87* | 0.65  | 0.68* | 0.43         |
| SNAIL                                         | 0.16  | 0.23  | 0.76* | 1*    | 0.6   | 0.63  | 0.67* | 0.86* | -0.14 | 0.76* | 0.18  | 0.44  | 0.03  | 0.15  | 0.34  | 0.84* | 0.25  | 0.58  | -0.02        |
| FOLR1                                         | 0.5   | 0.23  | 0.91* | 0.6   | 1*    | 0.58  | 0.47  | 0.72* | -0.25 | 0.89* | 0.4   | 0.82* | -0.18 | -0.45 | 0.03  | 0.83* | 0.76* | 0.82* | 0.38         |
| IL-6                                          | -0.15 | -0.05 | 0.72* | 0.63  | 0.58  | 1*    | 0.1   | 0.48  | -0.15 | 0.64  | 0.35  | 0.34  | -0.5  | -0.02 | 0.18  | 0.47  | 0.13  | 0.2   | 0.07         |
| BCL-2                                         | 0.68* | 0.52  | 0.64  | 0.67* | 0.47  | 0.1   | 1*    | 0.53  | -0.53 | 0.57  | 0.13  | 0.7*  | 0.6   | 0.25  | 0.34  | 0.75* | 0.51  | 0.6   | 0.34         |
| BIRC5                                         | 0.26  | 0.11  | 0.74* | 0.86* | 0.72* | 0.48  | 0.53  | 1*    | -0.05 | 0.83* | 0.22  | 0.51  | -0.17 | -0.29 | 0.28  | 0.88* | 0.46  | 0.71* | 0.11         |
| CCL2                                          | -0.58 | -0.01 | -0.4  | -0.14 | -0.25 | -0.15 | -0.53 | -0.05 | 1*    | -0.15 | 0.17  | -0.61 | -0.46 | 0.09  | -0.17 | -0.31 | -0.44 | -0.1  | -0.49        |
| CAV1                                          | 0.43  | 0.4   | 0.95* | 0.76* | 0.89* | 0.64  | 0.57  | 0.83* | -0.15 | 1*    | 0.62  | 0.78* | -0.23 | -0.23 | 0.17  | 0.87* | 0.64  | 0.71* | 0.31         |
| EGF                                           | 0.32  | 0.51  | 0.47  | 0.18  | 0.4   | 0.35  | 0.13  | 0.22  | 0.17  | 0.62  | 1*    | 0.49  | -0.3  | -0.06 | -0.14 | 0.3   | 0.44  | 0.22  | 0.01         |
| NFKB                                          | 0.84* | 0.39  | 0.85* | 0.44  | 0.82* | 0.34  | 0.7*  | 0.51  | -0.61 | 0.78* | 0.49  | 1*    | 0.19  | -0.29 | 0.1   | 0.78* | 0.9*  | 0.68* | 0.51         |
| NANOG                                         | 0.58  | 0.18  | -0.11 | 0.03  | -0.18 | -0.5  | 0.6   | -0.17 | -0.46 | -0.23 | -0.3  | 0.19  | 1*    | 0.39  | 0.12  | 0.13  | 0.21  | 0.19  | -0.06        |
| SOX2                                          | -0.22 | 0.21  | -0.16 | 0.15  | -0.45 | -0.02 | 0.25  | -0.29 | 0.09  | -0.23 | -0.06 | -0.29 | 0.39  | 1*    | 0.45  | -0.15 | -0.46 | -0.26 | -0.11        |
| POU5F                                         | 0.07  | -0.33 | 0.22  | 0.34  | 0.03  | 0.18  | 0.34  | 0.28  | -0.17 | 0.17  | -0.14 | 0.1   | 0.12  | 0.45  | 1*    | 0.38  | 0.09  | 0.24  | 0.38         |
| PGE2S                                         | 0.59  | 0.18  | 0.87* | 0.84* | 0.83* | 0.47  | 0.75* | 0.88* | -0.31 | 0.87* | 0.3   | 0.78* | 0.13  | -0.15 | 0.38  | 1*    | 0.72* | 0.88* | 0.25         |
| COX2                                          | 0.9*  | 0.14  | 0.65  | 0.25  | 0.76* | 0.13  | 0.51  | 0.46  | -0.44 | 0.64  | 0.44  | 0.9*  | 0.21  | -0.46 | 0.09  | 0.72* | 1*    | 0.78* | 0.39         |
| EP3                                           | 0.63  | 0.13  | 0.68* | 0.58  | 0.82* | 0.2   | 0.6   | 0.71* | -0.1  | 0.71* | 0.22  | 0.68* | 0.19  | -0.26 | 0.24  | 0.88* | 0.78* | 1*    | 0.2          |
| colony ratio                                  | 0.36  | 0.21  | 0.43  | -0.02 | 0.38  | 0.07  | 0.34  | 0.11  | -0.49 | 0.31  | 0.01  | 0.51  | -0.06 | -0.11 | 0.38  | 0.25  | 0.39  | 0.2   | 1*           |

**Supplementary table 4: log<sub>2</sub> fold change values of FaDu and Detroit 562 cells exposed to co-culture and/or cisplatin treatment.** All log<sub>2</sub> fold changes are calculated relative to untreated control of particular cell line (which log<sub>2</sub> fold change is equal to 0). CAF, cancer-associated fibroblast.

| FaDu cells + Cisplatin, log <sub>2</sub> fold change        |       |       |       |       |       |       |       |       |       |       |       |       |       |       |       |       |       |       |
|-------------------------------------------------------------|-------|-------|-------|-------|-------|-------|-------|-------|-------|-------|-------|-------|-------|-------|-------|-------|-------|-------|
| affected_by patient-derived CAFs                            | VEGFA | MKI67 | EGFR  | SNAIL | FOLR1 | IL-6  | BCL-2 | BIRC5 | CCL2  | CAV1  | EGF   | NFKB  | NANOG | SOX2  | POU5F | PGE2S | COX2  | EP3   |
| no coculture+cisplatin                                      | -1.35 | 0.09  | -0.53 | 0.09  | -1.01 | -0.41 | -0.48 | 0.02  | -0.47 | -0.51 | -0.70 | -0.55 | -0.31 | -0.45 | -0.16 | -0.17 | -0.75 | -1.00 |
| M11.1+cisplatin                                             | 1.35  | -0.74 | -0.38 | -0.38 | -0.22 | -2.03 | 0.76  | -0.74 | -2.43 | -0.72 | -1.73 | -0.48 | 2.06  | 1.00  | 0.34  | 0.20  | 0.26  | 0.25  |
| M12.1+cisplatin                                             | 1.71  | -0.23 | -0.38 | -0.09 | 0.23  | -1.15 | 0.53  | -0.18 | -0.67 | -0.46 | -1.70 | 0.38  | 0.84  | 0.15  | -0.41 | 0.20  | 0.48  | 0.16  |
| M14.1+cisplatin                                             | -1.65 | 0.08  | -1.06 | -0.31 | -2.48 | -1.56 | 0.24  | -0.15 | -0.04 | -0.69 | -1.31 | -0.97 | 0.16  | 0.02  | -0.05 | -0.56 | -1.23 | -1.75 |
| M5.1+cisplatin                                              | -0.91 | -0.32 | -1.42 | -0.34 | -2.17 | -2.61 | 0.27  | -0.01 | -0.06 | -0.96 | -0.98 | -0.92 | -0.09 | 0.08  | -0.51 | -0.40 | -1.42 | -0.62 |
| M6.1+cisplatin                                              | -0.49 | -0.40 | -0.93 | -0.63 | -0.98 | -3.13 | 0.09  | -0.15 | 0.43  | -1.01 | -1.80 | -0.37 | 0.02  | -0.01 | -0.57 | -0.22 | -1.47 | -0.75 |
| M7.1+cisplatin                                              | 1.08  | -0.76 | -0.78 | -0.81 | 0.12  | -2.45 | -0.23 | -0.39 | -1.36 | -0.94 | -1.15 | -0.39 | 0.14  | -0.18 | -0.84 | -0.04 | -0.59 | 0.37  |
| M9.1+cisplatin                                              | 0.81  | -0.93 | -0.79 | -0.82 | -0.24 | -2.59 | -0.01 | -0.59 | -2.91 | -1.04 | -1.66 | -0.56 | 0.29  | -0.50 | -0.73 | 0.20  | -0.46 | -2.12 |
| FaDu cells, untreated, log <sub>2</sub> fold change         |       |       |       |       |       |       |       |       |       |       |       |       |       |       |       |       |       |       |
| affected_by patient-derived CAFs                            | VEGFA | MKI67 | EGFR  | SNAIL | FOLR1 | IL-6  | BCL-2 | BIRC5 | CCL2  | CAV1  | EGF   | NFKB  | NANOG | SOX2  | POU5F | PGE2S | COX2  | EP3   |
| depleted medium                                             | -1.29 | -0.51 | -0.23 | 0.40  | -0.31 | -0.36 | 0.25  | 0.26  | -0.26 | -0.41 | -1.89 | -0.48 | 0.34  | 0.20  | 0.46  | 0.07  | -1.02 | 0.11  |
| M11.1                                                       | 0.95  | -0.91 | -0.62 | -0.47 | -0.74 | -1.98 | 0.14  | -0.21 | -0.63 | -0.70 | -1.45 | -0.15 | 0.62  | -0.04 | 0.90  | -0.09 | 0.30  | 0.19  |
| M12.1                                                       | 1.56  | -0.13 | -0.15 | -0.15 | 0.41  | -1.53 | 0.30  | 0.18  | -0.81 | -0.25 | -1.20 | 0.25  | 0.57  | -0.75 | -0.65 | 0.16  | 0.73  | 0.46  |
| M14.1                                                       | -1.64 | -0.64 | -1.43 | -0.99 | -2.05 | -2.00 | -0.61 | -0.99 | -0.21 | -1.45 | -1.71 | -0.97 | 0.27  | -0.06 | -0.48 | -1.33 | -1.59 | -1.12 |
| M5.1                                                        | 0.20  | -0.25 | -0.95 | -0.02 | -1.53 | -2.20 | 0.28  | -0.05 | 0.00  | -0.79 | -1.23 | -0.57 | 0.89  | 0.25  | 0.05  | -0.21 | -0.70 | -0.13 |
| M6.1                                                        | -0.31 | 0.45  | -0.62 | -0.27 | -0.81 | -2.26 | 0.22  | 0.02  | 0.20  | -0.43 | -0.98 | -0.37 | 0.26  | -0.05 | -0.02 | -0.32 | -0.66 | -0.13 |
| M7.1                                                        | 1.34  | 0.47  | -0.22 | -0.09 | -0.74 | -1.49 | 0.77  | -0.41 | -1.35 | -0.52 | -1.15 | 0.15  | 1.08  | 0.46  | 0.18  | -0.13 | -0.16 | -0.20 |
| M9.1                                                        | 0.13  | 0.07  | -0.89 | -0.54 | -0.86 | -2.37 | 0.04  | -0.65 | 0.32  | -0.90 | -1.23 | -0.49 | 0.79  | 0.27  | -0.26 | -0.52 | -0.47 | 0.15  |
| Detroit 562 cells, untreated, log <sub>2</sub> fold change  |       |       |       |       |       |       |       |       |       |       |       |       |       |       |       |       |       |       |
| affected_by patient-derived CAFs                            | VEGFA | MKI67 | EGFR  | SNAIL | FOLR1 | IL-6  | BCL-2 | BIRC5 | CCL2  | CAV1  | EGF   | NFKB  | NANOG | SOX2  | POU5F | PGE2S | COX2  | EP3   |
| depleted medium                                             | 0.00  | -1.09 | 0.63  | -0.10 | 0.82  | -0.16 | 0.71  | -1.49 | 1.02  | -0.61 | 1.71  | 0.38  | 2.31  | -0.25 | 0.45  | 0.48  | 1.09  | NA    |
| M11.1                                                       | 0.21  | -2.38 | -0.05 | 0.77  | -1.47 | -0.32 | -0.07 | -2.00 | -1.33 | -0.01 | -0.65 | -0.23 | 1.18  | -0.47 | -0.52 | 0.76  | -0.61 | NA    |
| M12.1                                                       | 0.00  | -2.38 | 0.04  | 0.87  | -1.26 | 0.11  | -0.19 | -1.99 | 0.02  | -0.35 | -0.26 | -0.11 | -0.01 | 1.26  | -0.68 | 0.71  | -0.39 | 0.35  |
| M14.1                                                       | 0.10  | -1.09 | 0.12  | 0.05  | 0.27  | 0.66  | 0.46  | -1.51 | 1.74  | -0.43 | 0.57  | 0.32  | 2.58  | 1.50  | 0.36  | 0.47  | 1.22  | NA    |
| M5.1                                                        | -0.07 | -1.85 | -0.18 | 0.29  | -1.56 | -0.02 | -0.14 | -1.84 | -0.76 | -0.09 | -0.34 | -0.29 | 0.02  | 1.04  | -0.91 | 0.59  | -0.39 | -1.27 |
| M6.1                                                        | -0.59 | -2.37 | 0.15  | -0.04 | -0.11 | 0.39  | -0.14 | -2.00 | -0.47 | -0.49 | 1.03  | 0.47  | 0.34  | 1.32  | -0.32 | 0.68  | 0.36  | 2.78  |
| M7.1                                                        | 0.51  | -1.08 | 0.57  | 1.40  | -2.77 | 0.81  | 0.14  | -0.63 | -3.19 | 0.23  | -0.91 | -0.29 | -0.28 | -0.53 | -1.06 | 0.88  | -1.06 | NA    |
| M9.1                                                        | -0.22 | -1.42 | -0.20 | -0.16 | -1.01 | -0.34 | -0.34 | -1.30 | -0.27 | -0.32 | 0.57  | -0.23 | 1.13  | 1.33  | -0.12 | 0.45  | 0.42  | NA    |
| Detroit 562 cells + Cisplatin, log <sub>2</sub> fold change |       |       |       |       |       |       |       |       |       |       |       |       |       |       |       |       |       |       |
| affected_by patient-derived CAFs                            | VEGFA | MKI67 | EGFR  | SNAIL | FOLR1 | IL-6  | BCL-2 | BIRC5 | CCL2  | CAV1  | EGF   | NFKB  | NANOG | SOX2  | POU5F | PGE2S | COX2  | EP3   |
| no coculture+cisplatin                                      | -0.36 | -1.08 | 0.62  | -0.20 | 0.80  | -0.86 | 1.15  | -1.27 | 1.31  | -0.47 | 1.99  | 0.52  | 3.49  | 0.78  | 1.50  | 0.82  | 0.79  | NA    |
| M11.1+cisplatin                                             | 0.67  | -2.39 | -0.07 | 1.12  | -1.28 | -0.11 | 0.09  | -1.24 | -0.54 | 0.04  | 0.13  | 0.03  | 0.28  | 0.59  | -0.49 | 1.22  | -0.94 | NA    |
| M12.1+cisplatin                                             | 0.08  | -2.48 | -0.09 | 0.70  | -1.22 | -0.27 | -0.71 | -2.61 | -0.02 | -0.45 | -0.52 | 0.12  | 2.72  | 1.87  | 0.05  | 0.74  | 0.19  | 0.84  |
| M14.1+cisplatin                                             | -0.53 | -2.21 | 0.05  | 0.26  | 0.07  | 0.66  | -0.25 | -2.32 | 0.70  | -0.82 | 1.74  | 0.23  | 1.93  | 1.82  | 0.51  | 0.38  | 1.00  | NA    |
| M5.1+cisplatin                                              | -0.22 | -1.55 | -0.06 | 0.15  | -0.66 | -0.30 | -0.13 | -1.52 | -0.99 | 0.09  | 0.34  | -0.02 | 0.28  | 1.26  | -0.44 | 0.61  | 0.06  | NA    |
| M6.1+cisplatin                                              | -0.76 | -0.89 | -0.21 | -0.02 | -0.14 | -0.03 | 1.22  | -1.19 | -0.07 | -0.34 | -0.07 | -0.34 | 1.60  | 1.42  | 0.24  | 0.33  | 0.40  | 0.10  |
| M7.1+cisplatin                                              | 0.74  | -0.04 | 0.36  | 1.06  | -2.36 | 0.61  | 0.07  | -0.32 | -2.59 | 0.25  | -1.40 | -0.13 | 0.02  | -0.69 | -1.76 | 0.76  | -0.77 | -1.21 |
| M9.1+cisplatin                                              | -0.02 | -0.89 | -0.22 | 0.27  | -0.50 | -0.01 | -0.10 | -0.77 | 0.15  | -0.12 | 0.16  | -0.05 | -0.07 | 1.33  | -0.63 | 0.50  | 0.23  | NA    |
